# Supplementary material for: Quantification of trace iodine using laser-induced breakdown spectroscopy for real-time monitoring of nuclear off-gas streams
Source: Royal Society of Chemistry journal article supplement (doi:10.1039/d5ja00481k), 2026-01-01
Supplement: d5ja00481k1.pdf [file d5ja00481k1.pdf]

## Supporting Information

### Quantification of Trace Iodine Using Laser-Induced Breakdown Spectroscopy for Real-Time Monitoring of Off-Gas Streams

Hunter B. Andrews,<sup>1\*</sup> Zechariah B. Kitzhaber,<sup>1</sup> Chase C. Cobble,<sup>2</sup> Joanna McFarlane,<sup>2</sup> Katherine R. Johnson<sup>2</sup>

<sup>1</sup>Radioisotope Science and Technology Division, Oak Ridge National Laboratory, Oak Ridge, Tennessee, USA

<sup>2</sup>Nuclear Energy and Fuel Cycle Division, Oak Ridge National Laboratory, Oak Ridge, Tennessee, USA

\*Corresponding author: (H.B.A.) [andrewshb@ornl.gov](mailto:andrewshb@ornl.gov)

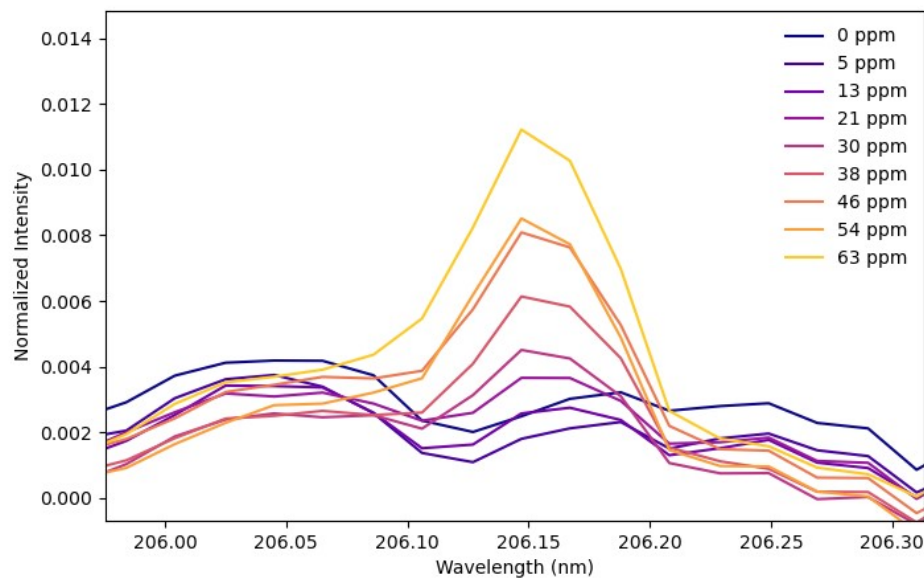

**Figure S1.** LIBS spectra showing the iodine 206.16 nm peak in a helium bulk gas.

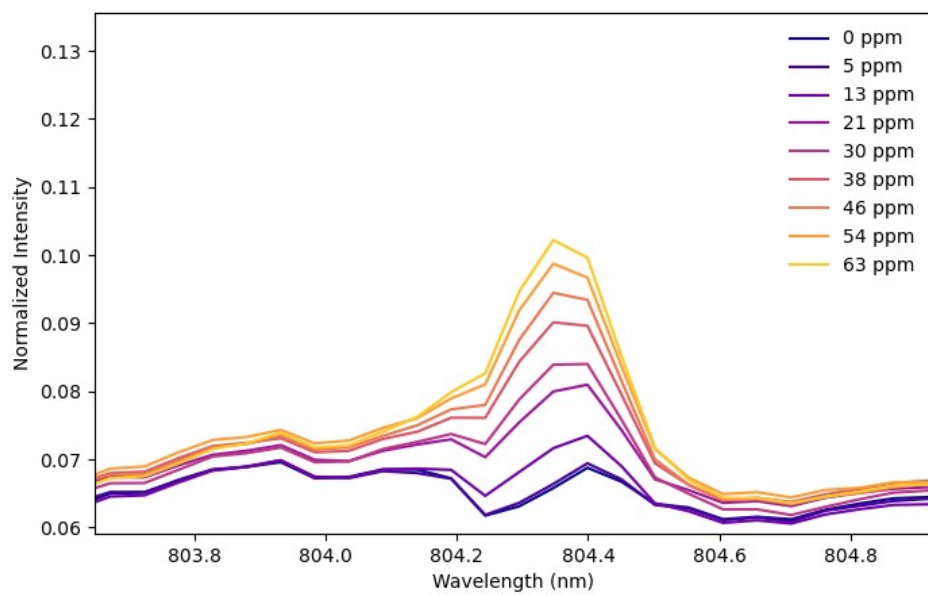

**Figure S2.** LIBS spectra showing the iodine 804.37 nm peak in a helium bulk gas.

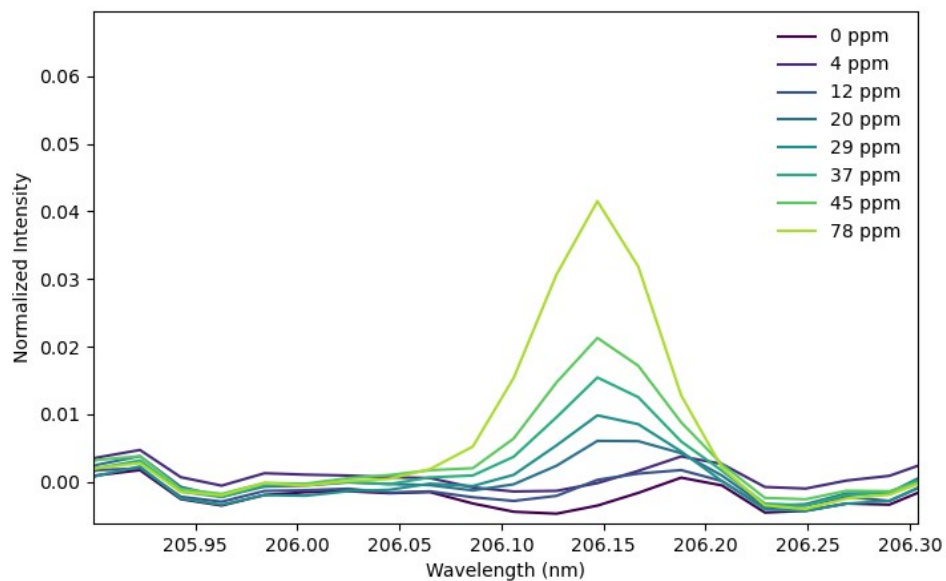

**Figure S3.** LIBS spectra showing the iodine 206.16 nm peak in an argon bulk gas.

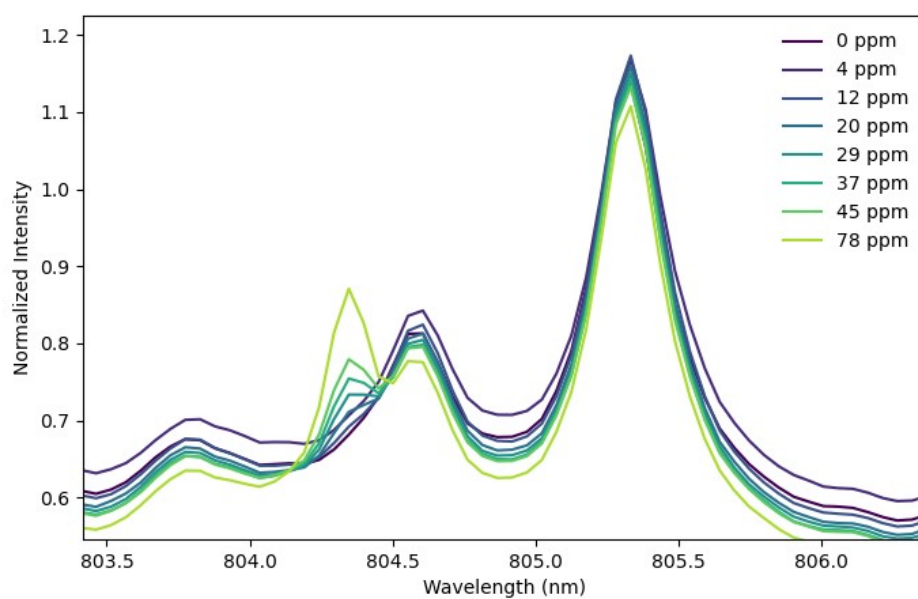

**Figure S4.** LIBS spectra showing the iodine 804.37 nm peak in an argon bulk gas. The other spectral features shown here correspond to the argon emissions.

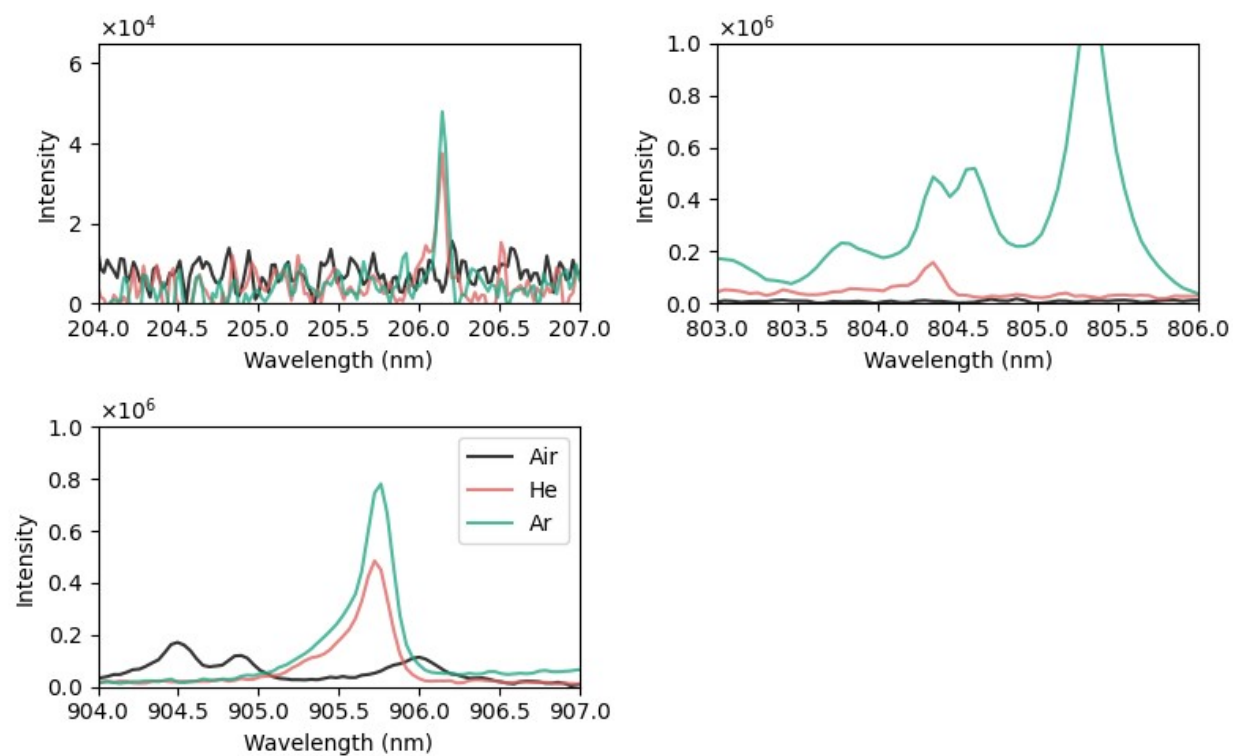

**Figure S5.** Overlaid spectra of nominally 80 ppm iodine in (black) air, (red) helium, and (green) argon.
